# Supplementary material for: Trimetallic PtAuNi alloy nanoparticles as an efficient electrocatalyst for the methanol electrooxidation reaction
Source: Royal Society of Chemistry journal article supplement (doi:10.1039/c7dt02608k), 2017-01-01
Supplement: c7dt02608k1.pdf [file c7dt02608k1.pdf]

## Electronic Supporting Information

### Trimetallic PtAuNi Alloy Nanoparticles as an Efficient Electrocatalyst for Methanol Electrooxidation Reaction

Kousik Bhunia, Santimoy Khilari, and Debabrata Pradhan\*

*Materials Science Centre, Indian Institute of Technology, Kharagpur, West Bengal 721302,  
India*

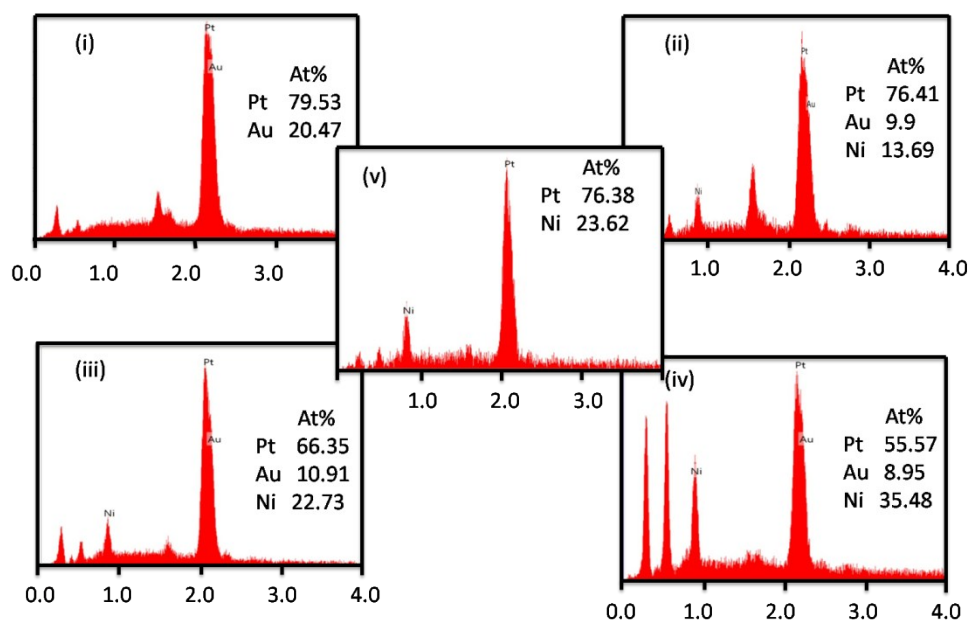

**Fig S1.** EDX spectra of alloy NPs solvothermally synthesized at 200°C for 72 h. (i) Pt<sub>80</sub>Au<sub>20</sub>, (ii) Pt<sub>76</sub>Au<sub>10</sub>Ni<sub>14</sub>, (iii) Pt<sub>66</sub>Au<sub>11</sub>Ni<sub>23</sub>, (iv) Pt<sub>55</sub>Au<sub>9</sub>Ni<sub>35</sub>, (v) Pt<sub>76</sub>Ni<sub>24</sub> NPs. The X-axis and Y-axis title of all above EDX spectra are Counts and Energy (keV), respectively.

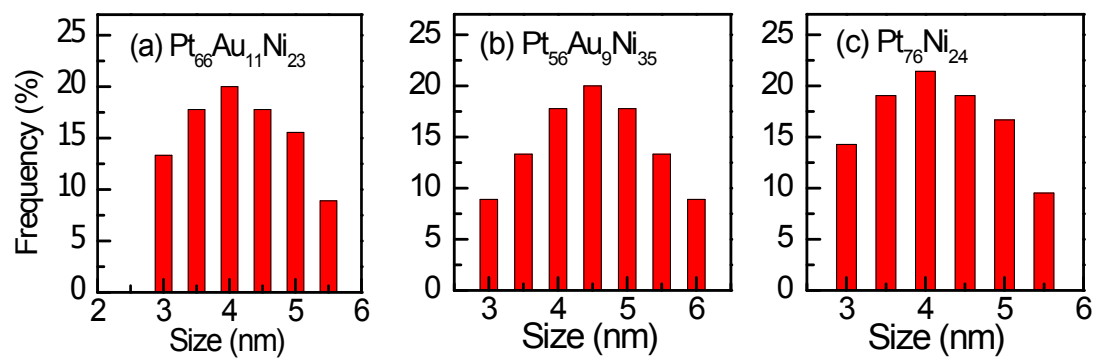

**Fig S2.** Histograms on the particle size of (a)  $\text{Pt}_{66}\text{Au}_{11}\text{Ni}_{23}$ , (b)  $\text{Pt}_{56}\text{Au}_9\text{Ni}_{35}$ , and (c)  $\text{Pt}_{76}\text{Ni}_{24}$  NPs.

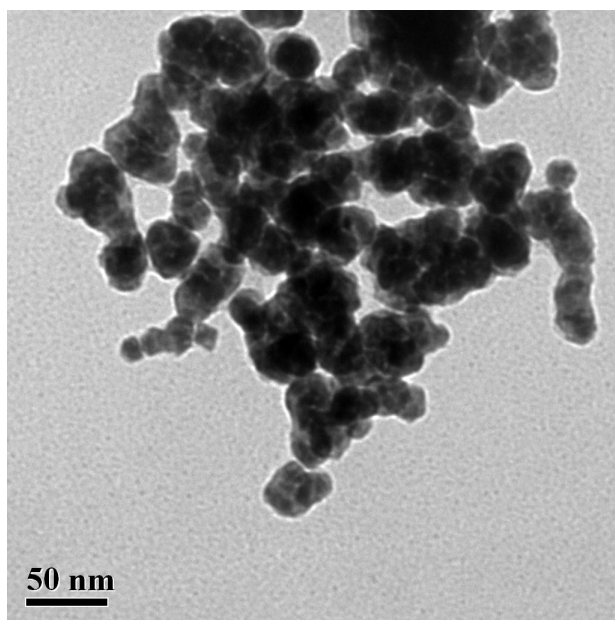

**Fig S3.** TEM image of  $\text{Pt}_{66}\text{Au}_{11}\text{Ni}_{23}$  NPs synthesized using the same procedure without adding PVP.

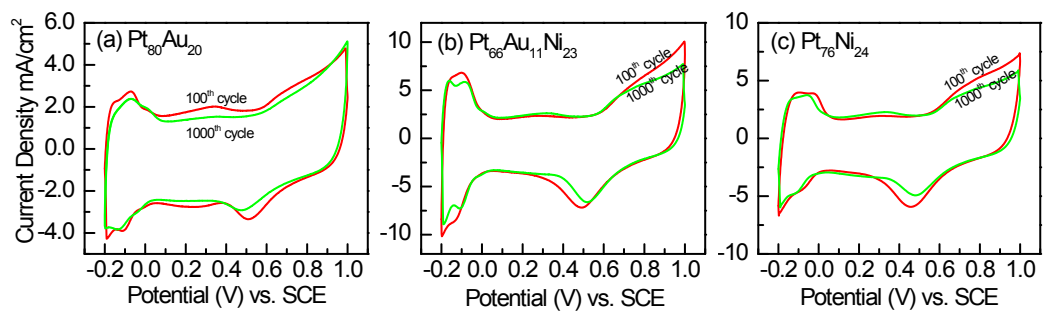

**Fig S4.** CVs of (a) Pt<sub>80</sub>Au<sub>20</sub>, (b) Pt<sub>66</sub>Au<sub>11</sub>Ni<sub>23</sub>, and (c) Pt<sub>76</sub>Ni<sub>24</sub> NPs at its 100<sup>th</sup> and 1000<sup>th</sup> cycles in 0.5 M H<sub>2</sub>SO<sub>4</sub>.
